# Supplementary material for: Nerve growth factor stimulates axon outgrowth through negative regulation of growth cone actomyosin restraint of microtubule advance
Source: PubMed Central journal article supplement — Mol Biol Cell. 2016 Feb 1;27(3):500–17. doi: 10.1091/mbc.E15-09-0636 (PMC4751601; doi:10.1091/mbc.e15-09-0636), 2016-02-01
Supplement: supp_E15-09-0636v1_CombinedSupMats.pdf [file supp_E15-09-0636v1_CombinedSupMats.pdf]

# Supplemental Materials

*Molecular Biology of the Cell*

Turney et al.
